# Supplementary material for: Non-sutural basicranium-derived cells undergo a unique mineralization pathway via a cartilage intermediate in vitro
Source: PeerJ. 2018 Oct 23;6:e5757. doi: 10.7717/peerj.5757 (PMC6202976; doi:10.7717/peerj.5757)
Supplement: Supplemental Information 29 [file peerj-06-5757-s029.xlsx]

## Sheet: Sheet1
	Raw Data - GAG content from Alcian Blue
	4 week
	2016-08-05	Blank	OM1	OM2	BMP1	BMP2
	rep1	0.041	0.082	0.1	0.677	0.435
	rep2	0.04	0.083	0.101	0.675	0.45
	2016-09-09	Blank	OM1	OM2	BMP1	BMP2
	rep1	0.04	0.229	0.189	1.723	1.342
	rep2	0.041	0.219	0.209	1.665	1.518
	rep3	0.04	0.237	0.206	1.568	1.532
	6 week
	2016-08-05	Blank	OM1	OM2	BMP1	BMP2
	rep1	0.039	0.278	0.281	2.771	2.505
	rep2	0.04	0.279	0.294	2.73	2.467
	2016-09-09	Blank	OM1	OM2	BMP1	BMP2
	rep1	0.039	0.066	0.072	0.791	0.993
	rep2	0.041	0.068	0.072	0.786	0.989
