# Supplementary material for: Non-sutural basicranium-derived cells undergo a unique mineralization pathway via a cartilage intermediate in vitro
Source: PeerJ. 2018 Oct 23;6:e5757. doi: 10.7717/peerj.5757 (PMC6202976; doi:10.7717/peerj.5757)
Supplement: Supplemental Information 30 [file peerj-06-5757-s030.xlsx]

## Sheet: Sheet1
	ALP - Absorbance Data, Experiment 1															ALP - Absorbance Data, Experiment 2
	Plate 1 Raw Data															Plate 1 - Raw Data
		1	2	3	4	5	6	7	8	9	10	11	12				1	2	3	4	5	6	7	8	9	10	11	12
	A	0.059	0.059	1.684	1.763	1.867	0.246	0.227	0.221	3.489	3.498	3.48				A	0.062	0.061	0.52	0.486	0.471	0.454	0.425	0.451	0.363	0.336	0.35	0.36
	B	0.192	0.194	1.751	1.755	1.824	0.244	0.223	0.221	3.473	3.496	3.472				B	0.16	0.162	0.203	0.175	0.159	0.155	0.167	0.161	0.145	0.14	0.142	0.141
	C	0.31	0.31	1	1.007	1.051	0.16	0.146	0.14	3.489	3.13	3.535				C	0.263	0.274	0.103	0.09	0.086	0.082	0.088	0.086	0.084	0.085	0.088	0.081
	D	0.534	0.533	1.004	1.144	1.145	0.161	0.144	0.141	3.466	3.127	3.444				D	0.46	0.473	0.072	0.073	0.074	0.065	0.071	0.07	0.073	0.072	0.083	0.071
	E	0.955	0.96	0.509	0.421	0.372	3.456	3.466	3.443							E	0.881	0.883	0.425	0.418	3.512	3.5	3.514	3.601	3.484	3.545
	F	1.702	1.702	0.491	0.415	0.365	3.454	3.47	3.458							F	1.608	1.609	0.15	0.158	3.443	3.462	1.868	1.748	3.047	2.707
	G	2.723	2.75	0.297	0.242	0.222	3.462	3.463	3.467							G	2.713	2.758	0.085	0.088	1.524	1.861	0.815	0.941	1.089	0.871
	H	3.396	3.422	0.297	0.249	0.223	3.473	3.494	3.502							H	3.407	3.392	0.073	0.069	0.552	0.578	0.294	0.327	0.353	0.479
	Plate 2 - Raw Data															Plate 2 - Raw Data
		1	2	3	4	5	6	7	8	9	10	11	12				1	2	3	4	5	6	7	8	9	10	11	12
	A	0.06	0.061	3.246	3.241	1.995	2.042	3.146	3.128	3.549	3.549	3.547	3.507			A	0.944	0.944	1.01	0.986	0.793	0.779	3.53	3.502	3.509	3.502	3.491	3.503
	B	0.173	0.174	2.039	1.98	1.097	1.093	1.983	1.871	3.505	3.446	3.453	3.422			B	0.29	0.277	0.292	0.289	0.248	0.251	3.54	3.537	3.486	3.544	3.515	3.486
	C	0.318	0.281	0.999	1.075	0.575	0.597	1.074	1.017	3.45	3.384	3.366	3.321			C	0.126	0.127	0.141	0.134	0.122	0.131	3.408	2.906	3.509	3.485	3.398	3.442
	D	0.48	0.534													D	0.074	0.077	0.077	0.078	0.078	0.078	1.466	0.827	1.461	1.38	1.042	1.303
	E	0.966	0.952	3.467	3.54	3.521	3.489	3.524	3.545	3.48	3.524					E	2.612	2.741	0.308	0.31	1.645	1.644	3.496	3.5	3.523	3.496	3.499	3.492
	F	1.822	1.761													F	0.911	0.908	0.121	0.121	0.486	0.504	3.512	3.546	2.027	3.544	3.499	3.487
	G	2.923	2.878	3.505	3.518	3.467	3.469	3.486	3.434	3.448	3.435					G	0.267	0.266	0.077	0.081	0.218	0.211	3.503	3.497	3.489	3.486	3.477	3.465
	H	3.503	3.47	3.511	3.492	3.489	3.478	3.511	3.483	3.533	3.526					H	0.12	0.114	0.068	0.067	0.106	0.104	2.771	2.4	2.372	2.651	2.108	1.879
	Plate 3 - Raw Data		*3rd plate run because additional dilution was necessary on these samples													*3rd plate not necessary because further dilution was not needed. Dilutions were based on values from Experiment #1
		1	2	3	4	5	6	7	8	9	10	11	12
	A	0.059	0.06	3.49	3.451	3.469	3.489	3.467	3.395
	B	0.163	0.165	3.435	3.394	3.186	3.224	3.383	2.929
	C	0.264	0.263	2.652	2.703	2.019	1.996	2.537	1.73
	D	0.464	0.457	1.523	1.613	1.156	1.192	1.522	0.985
	E	0.846	0.841	3.495	3.528	3.546	3.501	3.521	3.521
	F	1.632	1.601	3.488	3.472	3.49	3.476	3.485	3.463
	G	2.701	2.69	3.228	3.357	3.34	3.05	2.884	2.902
	H	3.425	3.449	2.035	2.193	2.186	1.994	1.674	1.707
	DNA - Fluorescence Data, Experiment 1															DNA - Fluorescence Data, Experiment 2
	Plate 1 - Raw Data															Plate 1 - Raw Data
	Raw Data															Raw Data
		1.69	1.918	17.225	17.158	20.106	0.63	0.614	0.685	0.728	0.769	0.71	0.755			1.305	1.596					179.323	174.882	214.301	243.336	87.66	91.316
		5.773	5.93	15.155	16.703	19.742	0.708	0.694	0.707	0.803	0.805	0.82	0.706			5.732	5.809					103.892	106.58	166.613	162.82	83.152	83.431
		38.702	37.761	34.923	25.501	39.188	52.074	72.508	81.828	0.612	0.684	0.473	0.674			39.794	39.029					181.245	179.729	211.185	209.046	215.422	181.06
		321.122	320.22	30.564	26.435	39.274	51.24	79.712	75.207	0.428	0.752	0.615	0.624			318.65	317.667					155.046	145.831	181.992	165.149	147.983	148.075
		3354.03	3431.38	44.166	55.087	56.995	139.01	262.557	256.91	0.51	0.677	0.45	0.784			3572.56	3472.79					494.566	533.143	610.899	641.344	518.21	478.261
		0.68	0.609	43.253	55.02	58.592	169.37	250.881	319.185	0.51	0.723	0.45	0.745									130.465	132.309	127.739	91.558	112.658	113.397
		0.495	0.689	63.885	56.615	68.964	360.776	374.417	266.512	0.442	0.672	0.493	0.56									421.399	425.235	268.94	291.1	413.9	409.365
		0.443	0.416	73.283	81.877	77.886	369.889	423.487	283.476	0.387	0.458	0.47	0.497
	Plate Layout															Plate Layout
		1	2	3	4	5	6	7	8								1	2	3	4	5	6	7	8	9	10	11	12
	A	Std A	Std A	d0 1	d0 2	d0 3										A	Std 1	Std 1					d0 (1)	d0 (1)	d0 (2)	d0 (2)	d0 (3)	d0 (3)
	B	Std B	Std B	d0 1	d0 2	d0 3										B	Std 2	Std 2					2w OM1	2w OM1	2w OM2	2w OM2	2w OM3	2w OM3
	C	Std C	Std C	w2 OM1	w2 OM2	w2 OM3	w2 BMP6 1	w2 BMP6 2	w2 BMP6 3							C	Std 3	Std 3					2w BMP6 1	2w BMP6 1	2w BMP6 2	2w BMP6 2	2w BMP6 3	2w BMP6 3
	D	Std D	Std D	w2 OM1	w2 OM2	w2 OM3	w2 BMP6 1	w2 BMP6 2	w2 BMP6 3							D	Std 4	Std 4					4w OM1	4w OM1	4w OM2	4w OM2	4w OM3	4w OM3
	E	Std E	Std E	w4 OM1	w4 OM2	w4 OM3	w4 BMP6 1	w4 BMP6 2	w4 BMP6 3							E	Std 5	Std 5					4w BMP6 1	4w BMP6 1	6w BMP6 2	6w BMP6 2	6w BMP6 3	6w BMP6 3
	F			w4 OM1	w4 OM2	w4 OM3	w4 BMP6 1	w4 BMP6 2	w4 BMP6 3							F							6w OM1	6w OM1	6w OM2	6w OM2	6w OM3	6w OM3
	G			w6 OM1	w6 OM2	w6 OM3	w6 BMP6 1	w6 BMP6 2	w6 BMP6 3							G							6w BMP6 1	6w BMP6 1	6w BMP6 2	6w BMP6 2	6w BMP6 3	6w BMP6 3
	H			w6 OM1	w6 OM2	w6 OM3	w6 BMP6 1	w6 BMP6 2	w6 BMP6 3							H
