# Supplementary material for: Non-sutural basicranium-derived cells undergo a unique mineralization pathway via a cartilage intermediate in vitro
Source: PeerJ. 2018 Oct 23;6:e5757. doi: 10.7717/peerj.5757 (PMC6202976; doi:10.7717/peerj.5757)
Supplement: Supplemental Information 31 [file peerj-06-5757-s031.xlsx]

## Sheet: Sheet1
	1	2	3	4	5	6	7	8	9	10	11	12
A	STD1	STD1		SPL1	SPL2	SPL3							Well ID
	20	20		67.67	67.67	67.67							Conc/Dil
				d0 1	d0 2	d0 3							Name
B	STD2	STD2		SPL1	SPL2	SPL3							Well ID
	16	16		67.67	67.67	67.67							Conc/Dil
				d0 1	d0 2	d0 3							Name
C	STD3	STD3		SPL4	SPL5	SPL6	SPL7	SPL8	SPL9				Well ID
	12	12		67.67	67.67	67.67	67.67	67.67	67.67				Conc/Dil
				w2 OM1	w2 OM2	w2 OM3	w2 B1	w2 B2	w2 B3				Name
D	STD4	STD4		SPL4	SPL5	SPL6	SPL7	SPL8	SPL9				Well ID
	8	8		67.67	67.67	67.67	67.67	67.67	67.67				Conc/Dil
				w2 OM1	w2 OM2	w2 OM3	w2 B1	w2 B2	w2 B3				Name
E	STD5	STD5		SPL10	SPL11	SPL12	SPL13	SPL14	SPL15				Well ID
	6	6		67.67	67.67	67.67	67.67	67.67	67.67				Conc/Dil
				w4 OM1	w4 OM2	w4 OM3	w4 B1	w4 B2	w4 B3				Name
F	STD6	STD6		SPL10	SPL11	SPL12	SPL13	SPL14	SPL15				Well ID
	4	4		67.67	67.67	67.67	67.67	67.67	67.67				Conc/Dil
				w4 OM1	w4 OM2	w4 OM3	w4 B1	w4 B2	w4 B3				Name
G	STD7	STD7		SPL16	SPL17	SPL18	SPL19	SPL20	SPL21				Well ID
	2	2		67.67	67.67	67.67	67.67	67.67	67.67				Conc/Dil
				w6 OM1	w6 OM2	w6 OM3	w6 B1	w6 B2	w6 B3				Name
H	STD8	STD8		SPL16	SPL17	SPL18	SPL19	SPL20	SPL21				Well ID
	0	0		67.67	67.67	67.67	67.67	67.67	67.67				Conc/Dil
				w6 OM1	w6 OM2	w6 OM3	w6 B1	w6 B2	w6 B3				Name
	1	2	3	4	5	6	7	8	9	10	11	12
A	1.358	1.347		0.555	0.554	0.565							612
B	1.187	1.124		0.557	0.551	0.568							612
C	1.065	1.105		0.565	0.535	0.572	0.637	0.625	0.741				612
D	0.875	0.943		0.565	0.558	0.556	0.637	0.653	0.748				612
E	0.796	0.835		0.551	0.539	0.557	0.597	0.673	0.757				612
F	0.712	0.75		0.551	0.544	0.554	0.598	0.627	0.817				612
G	0.61	0.646		0.57	0.567	0.571	0.59	0.611	0.045				612
H	0.514	0.547		0.588	0.571	0.594	0.59	0.634	0.046				612
	1	2	3	4	5	6	7	8	9	10	11	12
A	0.827	0.816		0.024	0.024	0.034							Blanked Data
B	0.657	0.594		0.027	0.02	0.038							Blanked Data
C	0.535	0.575		0.034	0.004	0.042	0.107	0.094	0.21				Blanked Data
D	0.345	0.413		0.035	0.028	0.025	0.107	0.122	0.218				Blanked Data
E	0.266	0.305		0.02	0.008	0.026	0.066	0.143	0.227				Blanked Data
F	0.182	0.22		0.02	0.014	0.023	0.067	0.096	0.286				Blanked Data
G	0.079	0.115		0.04	0.036	0.04	0.06	0.08	-0.485				Blanked Data
H	-0.016	0.016		0.058	0.04	0.063	0.06	0.104	-0.485				Blanked Data
	1	2	3	4	5	6	7	8	9	10	11	12
A	19.949	19.676		<0.000	<0.000	0.076							[Concentration]
B	15.682	14.095		<0.000	<0.000	0.157							[Concentration]
C	12.619	13.616		0.076	<0.000	0.262	1.894	1.578	4.481				[Concentration]
D	7.853	9.56		0.079	<0.000	<0.000	1.886	2.28	4.674				[Concentration]
E	5.87	6.858		<0.000	<0.000	<0.000	0.879	2.791	4.892				[Concentration]
F	3.764	4.729		<0.000	<0.000	<0.000	0.894	1.628	6.391				[Concentration]
G	1.197	2.107		0.212	0.124	0.227	0.708	1.23	<0.000				[Concentration]
H	<0.000	<0.000		0.655	0.224	0.798	0.711	1.821	<0.000				[Concentration]
	1	2	3	4	5	6	7	8	9	10	11	12
A	1.344	1.337		0.553	0.548	0.559							612
B	1.183	1.109		0.555	0.549	0.564							612
C	1.045	1.074		0.563	0.536	0.552	0.629	0.624	0.747				612
D	0.87	0.93		0.547	0.554	0.557	0.637	0.653	0.749				612
E	0.793	0.826		0.551	0.54	0.558	0.6	0.641	0.762				612
F	0.709	0.749		0.553	0.546	0.555	0.597	0.626	0.775				612
G	0.597	0.641		0.573	0.566	0.575	0.593	0.613	0.612				612
H	0.516	0.547		0.566	0.572	0.59	0.594	0.61	0.62				612
	1	2	3	4	5	6	7	8	9	10	11	12
A	0.812	0.805		0.022	0.017	0.028							Blanked Data
B	0.651	0.578		0.024	0.018	0.033							Blanked Data
C	0.514	0.542		0.031	0.005	0.021	0.097	0.092	0.216				Blanked Data
D	0.338	0.399		0.016	0.023	0.026	0.105	0.122	0.218				Blanked Data
E	0.262	0.295		0.02	0.008	0.027	0.069	0.11	0.23				Blanked Data
F	0.178	0.218		0.022	0.015	0.024	0.066	0.095	0.244				Blanked Data
G	0.065	0.11		0.041	0.035	0.043	0.062	0.082	0.081				Blanked Data
H	-0.016	0.016		0.034	0.041	0.058	0.062	0.079	0.088				Blanked Data
	1	2	3	4	5	6	7	8	9	10	11	12
A	20.017	19.836		<0.000	<0.000	0.027							[Concentration]
B	15.913	14.035		<0.000	<0.000	0.144							[Concentration]
C	12.406	13.135		0.116	<0.000	<0.000	1.796	1.661	4.808				[Concentration]
D	7.941	9.478		<0.000	<0.000	<0.000	1.997	2.415	4.867				[Concentration]
E	5.994	6.827		<0.000	<0.000	0.001	1.069	2.112	5.181				[Concentration]
F	3.842	4.862		<0.000	<0.000	<0.000	0.993	1.735	5.532				[Concentration]
G	0.978	2.109		0.366	0.203	0.417	0.893	1.401	1.37				[Concentration]
H	<0.000	<0.000		0.193	0.353	0.802	0.901	1.322	1.569				[Concentration]
Curve Name	Curve Formula	Parameter	Value	Std. Error	95% CI min	95% CI max	Fit F Prob
StdCurve	Y=A*X+B	A	0.0399	0.00175	0.0356	0.0442	?????
		B	0.0314	0.0188	-0.0145	0.0773
Curve Name	Curve Formula	A	B	R2	Fit F Prob
StdCurve	Y=A*X+B	0.0399	0.0314	0.989	?????
Curve Name	Curve Formula	Parameter	Value	Std. Error	95% CI min	95% CI max	Fit F Prob
StdCurve	Y=A*X+B	A	0.0392	0.00153	0.0355	0.043	?????
		B	0.0269	0.0164	-0.0132	0.0671
Curve Name	Curve Formula	A	B	R2	Fit F Prob
StdCurve	Y=A*X+B	0.0392	0.0269	0.991	?????
