# Supplementary material for: Non-sutural basicranium-derived cells undergo a unique mineralization pathway via a cartilage intermediate in vitro
Source: PeerJ. 2018 Oct 23;6:e5757. doi: 10.7717/peerj.5757 (PMC6202976; doi:10.7717/peerj.5757)
Supplement: Supplemental Information 32 [file peerj-06-5757-s032.xlsx]

## Sheet: Sheet1
	Raw Data from Experiment 1					Raw Data from Experiment 2
	Well	Sample Name	Target Name	Cт		Well	Sample Name	Target Name	Cт
	A1	d0 1	GAPDH	18.9601		A1	d0 1	GAPDH	18.8542
	A2	d0 1	GAPDH	19.0281		A2	d0 1	GAPDH	18.9548
	A3	4w BMP6 3	GAPDH	18.9377		A3	4w BMP6 3	GAPDH	19.0689
	A4	4w BMP6 3	GAPDH	18.9668		A4	4w BMP6 3	GAPDH	19.006
	A5	d0 1	Sox9	31.6265		A5	d0 1	Sox9	33.0757
	A6	d0 1	Sox9	31.4225		A6	d0 1	Sox9	33.3793
	A7	4w BMP6 3	Sox9	30.0189		A7	4w BMP6 3	Sox9	29.5141
	A8	4w BMP6 3	Sox9	29.9879		A8	4w BMP6 3	Sox9	29.24
	A9	d0 1	ColX	23.9844		A9	d0 1	ColX	24.5908
	A10	d0 1	ColX	23.9626		A10	d0 1	ColX	24.6976
	A11	4w BMP6 3	ColX	23.0937		A11	4w BMP6 3	ColX	24.3361
	A12	4w BMP6 3	ColX	23.1045		A12	4w BMP6 3	ColX	24.4475
	B1	d0 2	GAPDH	18.7833		B1	d0 2	GAPDH	19.0403
	B2	d0 2	GAPDH	18.7751		B2	d0 2	GAPDH	18.9637
	B3	6w OM1	GAPDH	19.414		B3	6w OM1	GAPDH	20.4215
	B4	6w OM1	GAPDH	19.4468		B4	6w OM1	GAPDH	20.3244
	B5	d0 2	Sox9	31.2573		B5	d0 2	Sox9	33.4276
	B6	d0 2	Sox9	31.1827		B6	d0 2	Sox9	33.7743
	B7	6w OM1	Sox9	30.1519		B7	6w OM1	Sox9	29.7761
	B8	6w OM1	Sox9	30.4472		B8	6w OM1	Sox9	29.6204
	B9	d0 2	ColX	23.507		B9	d0 2	ColX	24.6332
	B10	d0 2	ColX	23.4772		B10	d0 2	ColX	24.6581
	B11	6w OM1	ColX	26.1448		B11	6w OM1	ColX	27.2256
	B12	6w OM1	ColX	26.0306		B12	6w OM1	ColX	27.0751
	C1	d0 3	GAPDH	18.8193		C1	d0 3	GAPDH	18.681
	C2	d0 3	GAPDH	18.8043		C2	d0 3	GAPDH	18.6429
	C3	6w OM2	GAPDH	19.5284		C3	6w OM2	GAPDH	20.0466
	C4	6w OM2	GAPDH	19.4914		C4	6w OM2	GAPDH	19.9656
	C5	d0 3	Sox9	30.9509		C5	d0 3	Sox9	32.4993
	C6	d0 3	Sox9	30.8083		C6	d0 3	Sox9	32.7573
	C7	6w OM2	Sox9	30.3136		C7	6w OM2	Sox9	29.4801
	C8	6w OM2	Sox9	30.3757		C8	6w OM2	Sox9	29.5489
	C9	d0 3	ColX	23.3884		C9	d0 3	ColX	24.0152
	C10	d0 3	ColX	23.601		C10	d0 3	ColX	24.062
	C11	6w OM2	ColX	23.9433		C11	6w OM2	ColX	26.725
	C12	6w OM2	ColX	23.9418		C12	6w OM2	ColX	26.9151
	D1	4w OM1	GAPDH	19.6578		D1	4w OM1	GAPDH	20.1355
	D2	4w OM1	GAPDH	19.6169		D2	4w OM1	GAPDH	20.1447
	D3	6w OM3	GAPDH	18.9089		D3	6w OM3	GAPDH	19.7968
	D4	6w OM3	GAPDH	18.9215		D4	6w OM3	GAPDH	19.7692
	D5	4w OM1	Sox9	30.8713		D5	4w OM1	Sox9	30.5142
	D6	4w OM1	Sox9	30.2572		D6	4w OM1	Sox9	30.4612
	D7	6w OM3	Sox9	29.9877		D7	6w OM3	Sox9	29.5584
	D8	6w OM3	Sox9	29.9653		D8	6w OM3	Sox9	29.5642
	D9	4w OM1	ColX	27.522		D9	4w OM1	ColX	27.8091
	D10	4w OM1	ColX	27.8322		D10	4w OM1	ColX	27.8391
	D11	6w OM3	ColX	25.4005		D11	6w OM3	ColX	26.8158
	D12	6w OM3	ColX	25.5074		D12	6w OM3	ColX	26.9183
	E1	4w OM2	GAPDH	19.9404		E1	4w OM2	GAPDH	20.2878
	E2	4w OM2	GAPDH	19.695		E2	4w OM2	GAPDH	20.2117
	E3	6w BMP6 1	GAPDH	19.0112		E3	6w BMP6 1	GAPDH	18.9595
	E4	6w BMP6 1	GAPDH	18.9474		E4	6w BMP6 1	GAPDH	18.9349
	E5	4w OM2	Sox9	30.4538		E5	4w OM2	Sox9	30.2282
	E6	4w OM2	Sox9	30.5148		E6	4w OM2	Sox9	30.0793
	E7	6w BMP6 1	Sox9	29.2408		E7	6w BMP6 1	Sox9	29.3941
	E8	6w BMP6 1	Sox9	28.9971		E8	6w BMP6 1	Sox9	29.136
	E9	4w OM2	ColX	27.9659		E9	4w OM2	ColX	26.2274
	E10	4w OM2	ColX	27.7727		E10	4w OM2	ColX	26.1198
	E11	6w BMP6 1	ColX	22.573		E11	6w BMP6 1	ColX	21.9372
	E12	6w BMP6 1	ColX	22.6106		E12	6w BMP6 1	ColX	21.9213
	F1	4w OM3	GAPDH	20.7354		F1	4w OM3	GAPDH	20.376
	F2	4w OM3	GAPDH	20.9107		F2	4w OM3	GAPDH	20.3454
	F3	6w BMP6 2	GAPDH	18.6775		F3	6w BMP6 2	GAPDH	18.9535
	F4	6w BMP6 2	GAPDH	18.7059		F4	6w BMP6 2	GAPDH	18.9318
	F5	4w OM3	Sox9	30.9127		F5	4w OM3	Sox9	30.6233
	F6	4w OM3	Sox9	31.0069		F6	4w OM3	Sox9	30.361
	F7	6w BMP6 2	Sox9	29.4777		F7	6w BMP6 2	Sox9	29.5242
	F8	6w BMP6 2	Sox9	29.1383		F8	6w BMP6 2	Sox9	29.5288
	F9	4w OM3	ColX	27.7375		F9	4w OM3	ColX	27.2739
	F10	4w OM3	ColX	27.8641		F10	4w OM3	ColX	27.3084
	F11	6w BMP6 2	ColX	21.882		F11	6w BMP6 2	ColX	23.1758
	F12	6w BMP6 2	ColX	21.9461		F12	6w BMP6 2	ColX	23.1578
	G1	4w BMP6 1	GAPDH	18.9391		G1	4w BMP6 1	GAPDH	19.0004
	G2	4w BMP6 1	GAPDH	18.9285		G2	4w BMP6 1	GAPDH	18.9842
	G3	6w BMP6 3	GAPDH	18.5217		G3	6w BMP6 3	GAPDH	19.2893
	G4	6w BMP6 3	GAPDH	18.5354		G4	6w BMP6 3	GAPDH	19.3105
	G5	4w BMP6 1	Sox9	30.15		G5	4w BMP6 1	Sox9	29.5574
	G6	4w BMP6 1	Sox9	30.4777		G6	4w BMP6 1	Sox9	29.49
	G7	6w BMP6 3	Sox9	28.9321		G7	6w BMP6 3	Sox9	29.3268
	G8	6w BMP6 3	Sox9	29.3015		G8	6w BMP6 3	Sox9	29.0752
	G9	4w BMP6 1	ColX	22.8063		G9	4w BMP6 1	ColX	22.9645
	G10	4w BMP6 1	ColX	22.7543		G10	4w BMP6 1	ColX	23.0279
	G11	6w BMP6 3	ColX	22.7474		G11	6w BMP6 3	ColX	23.8954
	G12	6w BMP6 3	ColX	22.8499		G12	6w BMP6 3	ColX	23.896
	H1	4w BMP6 3	GAPDH	19.1314		H1	4w BMP6 3	GAPDH	19.0545
	H2	4w BMP6 3	GAPDH	19.0361		H2	4w BMP6 3	GAPDH	18.9275
	H5	4w BMP6 3	Sox9	30.6625		H5	4w BMP6 3	Sox9	29.1462
	H6	4w BMP6 3	Sox9	30.7406		H6	4w BMP6 3	Sox9	29.1782
	H9	4w BMP6 3	ColX	23.5533		H9	4w BMP6 3	ColX	23.3913
	H10	4w BMP6 3	ColX	23.632		H10	4w BMP6 3	ColX	23.2902
